# Supplementary material
Source: HighWire-hosted journal article supplement (https://rmdopen.bmj.com/content/4/1/e000641)
Supplement: inline-supplementary-material-3 [file inline-supplementary-material-3.docx]

| **Supplementary Table 3: Correlation of the baseline SPARRA questionnaire items with clinical parameters (N=208)** | | | |
| --- | --- | --- | --- |
| **Questionnaire item** | **VAS pain** | **VAS global** | **VAS fatigue** |
| Joint pain severity1 | 0.633 |  |  |
| Joint pain impact2 | 0.583 | 0.61 |  |
| Joint swelling impact |  | 0.38 |  |
| Joint stiffness impact |  | 0.58 |  |
| Fatigue severity |  |  | 0.613 |
| Fatigue impact |  |  | 0.583 |
| Emotional distress impact |  | 0.44 |  |
| Sleep problems impact |  | 0.49 |  |
| Correlations expressed as Spearman’s rank correlation coefficients, all p-values were <0.01  Visual Analogue Scale (VAS) scores used as continuous data  1 Severity categories: none, mild, moderate, severe (applicable to all questionnaire items)  2 Impact categories: no, small, moderate, large impact (applicable to all questionnaire items)  3 Measuring concurrent validity (versus those without asterisk measuring construct validity) | | | |
